# Supplementary material for: Computationally-driven identification of antibody epitopes
Source: eLife. 2017 Dec 4;6:e29023. doi: 10.7554/eLife.29023 (PMC5739537; doi:10.7554/eLife.29023)
Supplement: Figure 2—source data 1. [file elife-29023-fig2-data1.xlsx]

## Sheet: Plotted Expn&WTNormalized
	TZ47-Ag1			TZ47-Ag2			TZ47-Ag3			TZ47-Ag4
TZ47	0.74078	0.743312	0.732613	1.11555	1.18194	1.13716	0.937189	0.967696	0.992945	0.000605	0.001104	0.000802
Nkp30-Ig	0.762351	0.768012	0.749722	1.45681	1.33659	1.47002	1.79737	1.90561	1.95487	0.977242	1.09845	1.01673
	PB-Ag2
PB11	*Excluded	0.004191	0.004131
Nkp30-Ig	0.196034	0.240969	0.237125
*Exclusion criteria: <1500 live cells sampled and raw MFI two orders of magnitude different from the other two replicates
