# Supplementary material for: Computationally-driven identification of antibody epitopes
Source: eLife. 2017 Dec 4;6:e29023. doi: 10.7554/eLife.29023 (PMC5739537; doi:10.7554/eLife.29023)
Supplement: Figure 3—source data 1. [file elife-29023-fig3-data1.xlsx]

## Sheet: Plotted Expn&WTNormalized
	MULTI-4			MULTI-1
PB11	0.375856	0.45362	0.457867	*Excluded	0.000741	0.001079
TZ47	0.000132	0.000164	0.000204	0.597381	0.585737	0.583017
Nkp30-Ig	0.641623	0.652511	0.592268	0.438394	0.51896	0.523992
*Exclusion criteria: <1500 live cells sampled and raw MFI two orders of magnitude different from the other two replicates
