# Supplementary material for: Computationally-driven identification of antibody epitopes
Source: eLife journal article supplement (doi:10.7554/elife.29023), 2017-12-04
Supplement: supp [file elife_poa_e29023_Supplementary_File_3.pdf › elife_poa_e29023_Supplementary_File_3.pdf]

### **TZ47 scFv**

QVQLQQSGAELMKPGASVKLSCKATGYTFTGYWIEWIKQRPBGHLEWIGEILPGTGSTNYNEKFKGKATFTADTSS  
NTAYMQLSSLTTEDSAIYYCAIPGMDYWGQGTSVTVSSAGGGGSGGGGSGGGGSEFDIKMTQSPSSMYASLGER  
VTITCKASQDINSYLSWFQQKPGKSPKTLIYRANRLVDGVPSRFSGSGSQDYSLTISSLEYEDMGIYYCLQYDEFPYTF  
GGGKLEIK

### **TZ47-specific Designs**

Summary of TZ47-specific Design Mutations

| Design   | Mutations           |
|----------|---------------------|
| TZ47-Ag1 | F24Y, N26Q, W75E    |
| TZ47-Ag2 | F161D, I165Q, V202T |
| TZ47-Ag3 | T48K, K51E, V53H    |
| TZ47-Ag4 | M131E, N134G, S194H |

\*Mutations annotated in red

#### **TZ47-Ag1**

GDLKVEMMAGGTQITPLNDNVTIY**CQ**IFYSQPLNITSMGITWFWKSLTFDKEVKVFEFFGDHQEAFRPGAIVSP**ERL**  
KSGDASLRPLPGIQLEEAGEYRCEVVVTP**LA**QGT**VQ**LEV**VAS**PARLLLDQVGMKENEDKYMCESSGFYPEAINITW  
EKQTQKFPHPIEISEDVITGPTIKNMDGTFNVT**SCL**KL**NSSQ**EDPGTVYQCVVRHASLHTPLRSNFTLTAARHSLSETE  
KTDNFS

#### **TZ47-Ag2**

GDLKVEMMAGGTQITPLNDNVTIFCNIFYSQPLNITSMGITWFWKSLTFDKEVKVFEFFGDHQEAFRPGAIVSPWR  
LKSGDASLRPLPGIQLEEAGEYRCEVVVTP**LA**QGT**VQ**LEV**VAS**PARLLLDQVGMKENEDKYMCESSGFYPEAINIT  
WEKQTQK**D**PH**PQ**EISEDVITGPTIKNMDGTFNVT**SCL**KL**NSSQ**EDPG**TY**QCVVRHASLHTPLRSNFTLTAARHSL  
ETEKTDNFS

#### **TZ47-Ag3**

GDLKVEMMAGGTQITPLNDNVTIFCNIFYSQPLNITSMGITWFWKSL**KFDEEH**KVFEFFGDHQEAFRPGAIVSPWR  
LKSGDASLRPLPGIQLEEAGEYRCEVVVTP**LA**QGT**VQ**LEV**VAS**PARLLLDQVGMKENEDKYMCESSGFYPEAINIT  
WEKQTQKFPHPIEISEDVITGPTIKNMDGTFNVT**SCL**KL**NSSQ**EDPGTVYQCVVRHASLHTPLRSNFTLTAARHSLSE  
TEKTDNFS

#### **TZ47-Ag4**

GDLKVEMMAGGTQITPLNDNVTIFCNIFYSQPLNITSMGITWFWKSLTFDKEVKVFEFFGDHQEAFRPGAIVSPWR  
LKSGDASLRPLPGIQLEEAGEYRCEVVVTP**LA**QGT**VQ**LEV**VAS**PARLLLDQVGE**KEG**EDKYMCESSGFYPEAINITW  
EKQTQKFPHPIEISEDVITGPTIKNMDGTFNVT**SCL**KL**HSQ**EDPGTVYQCVVRHASLHTPLRSNFTLTAARHSLSETE  
KTDNFS

-----

### **PB11 scFv**

QVQLVQSGAEVKKPGASVKISKASGYTLGTYTLHWMRQAPGQRIEWMGWINPGNGYTKYSQRFQGRVTINRDT  
SATTYMESSLRSEDTAVYFCATDRAPVRRAFDIWGQGTMTVSSGILSGGGGSGGGGSGGGGSGSVLTQPAS  
VSGSPGQSVTISCTGTSSDIGSYKFVSWYQHHPGKAPKLMYDVTQRPSPGVPRFSGSKSGNTASLTISGLQAEDEAD  
YYCCSYAGDYTYALFGGGTQLTVLS

### **PB-specific Designs**

Summary of PB-specific Design Mutations

| Design | Mutations           |
|--------|---------------------|
| PB-Ag1 | M7V, Q109V, Q113L   |
| PB-Ag2 | F28H, Y29D, R76G    |
| PB-Ag3 | A65T, F66T, G88R    |
| PB-Ag4 | T153K, V171I, R208E |
| PB-Ag5 | N193K, S194A, Q196V |

\*Mutations annotated in red

**PB-Ag1**

GD LKVEV MAGGTQITPLNDNVTIFCNIFYSQPLNITSMGITWFWKSLTFDKEVKVFEFFGDHQEAFRPGAIVSPWRL  
KSGDASLRLPGIQLEEAGEYRCEVVVTP LKA VGTV LLEVVASPASRLLLDQVGMKENEDKYMCESSGFYPEAINITWE  
KQTQKFPHPIEISEDVITGPTIKNMDGTFNVT SCLKLNSSQEDPGTVYQCVVRHASLHTPLRSNFTLTAARHSLSETEK  
TDNFS

**PB-Ag2**

GD LKVEMMAGGTQITPLNDNVTIFCNHDSQPLNITSMGITWFWKSLTFDKEVKVFEFFGDHQEAFRPGAIVSPWG  
LKSGDASLRLPGIQLEEAGEYRCEVVVTP LKAQGT VQLEVVASPASRLLLDQVGMKENEDKYMCESSGFYPEAINIT  
WEKQTQKFPHPIEISEDVITGPTIKNMDGTFNVT SCLKLNSSQEDPGTVYQCVVRHASLHTPLRSNFTLTAARHSLSE  
TEKTDNFS

**PB-Ag3**

GD LKVEMMAGGTQITPLNDNVTIFCNIFYSQPLNITSMGITWFWKSLTFDKEVKVFEFFGDHQETTRPGAIVSPWRL  
KSGDASLRLRRIQLEEAGEYRCEVVVTP LKAQGT VQLEVVASPASRLLLDQVGMKENEDKYMCESSGFYPEAINITW  
EKQTQKFPHPIEISEDVITGPTIKNMDGTFNVT SCLKLNSSQEDPGTVYQCVVRHASLHTPLRSNFTLTAARHSLSETE  
KTDNFS

**PB-Ag4**

GD LKVEMMAGGTQITPLNDNVTIFCNIFYSQPLNITSMGITWFWKSLTFDKEVKVFEFFGDHQEAFRPGAIVSPWR  
LKSGDASLRLPGIQLEEAGEYRCEVVVTP LKAQGT VQLEVVASPASRLLLDQVGMKENEDKYMCESSGFYPEAINIK  
WEKQTQKFPHPIEISEDITGPTIKNMDGTFNVT SCLKLNSSQEDPGTVYQCVVEHASLHTPLRSNFTLTAARHSLSET  
EKTDNFS

**PB-Ag5**

GD LKVEMMAGGTQITPLNDNVTIFCNIFYSQPLNITSMGITWFWKSLTFDKEVKVFEFFGDHQEAFRPGAIVSPWR  
LKSGDASLRLPGIQLEEAGEYRCEVVVTP LKAQGT VQLEVVASPASRLLLDQVGMKENEDKYMCESSGFYPEAINIT  
WEKQTQKFPHPIEISEDVITGPTIKNMDGTFNVT SCLK KASVEDPGTVYQCVVRHASLHTPLRSNFTLTAARHSLSET  
EKTDNFS

**Multi-Ab Designs**

Summary of MULTI-specific Design Mutations

| Design  | Mutations           |
|---------|---------------------|
| MULTI-1 | N34D, D61N, W75E    |
| MULTI-2 | F43Y, T48K, F49D    |
| MULTI-3 | V55L, F66T, G88R    |
| MULTI-4 | M131E, N134E, N193K |
| MULTI-5 | A149H, R208E, A210E |
| MULTI-6 | T153K, R208E, H213S |

\*Mutations annotated in red

**MULTI-1**

GD LKVEMMAGGTQITPLNDNVTIFCNIFYSQPLDITSMGITWFWKSLTFDKEVKVFEFFGNHQEAFRPGAIVSPERL  
KSGDASLRLPGIQLEEAGEYRCEVVVTP LKAQGT VQLEVVASPASRLLLDQVGMKENEDKYMCESSGFYPEAINITW  
EKQTQKFPHPIEISEDVITGPTIKNMDGTFNVT SCLKLNSSQEDPGTVYQCVVRHASLHTPLRSNFTLTAARHSLSETE  
KTDNFS

**MULTI-2**

GD LKVEMMAGGTQITPLNDNVTIFCNIFYSQPLNITSMGITWYWKSLKDDKEVKVFEFFGDHQEAFRPGAIVSPWR  
LKSGDASLRLPGIQLEEAGEYRCEVVVTP LKAQGT VQLEVVASPASRLLLDQVGMKENEDKYMCESSGFYPEAINIT  
WEKQTQKFPHPIEISEDVITGPTIKNMDGTFNVT SCLKLNSSQEDPGTVYQCVVRHASLHTPLRSNFTLTAARHSLSE  
TEKTDNFS

**MULTI-3**

GDLKVEMMAGGTQITPLNDNVTIFCNIFYSQLNITSMGITWFWKSLTFDKEVKLFEFFGDHQEATRPGAIVSPWRL  
KSGDASLRRLPRIQLEEAGEYRCEVVVTPKAQGTQVLEVVASPASRLLDQVGMKENEDKYMCESSGFYPEAINITW  
EKQTQKFPHPHIEISEDVITGPTIKNMDGTFNVTSCLLNSSQEDPGTVYQCVVRHASLHTPLRSNFTLTAARHSLSETE  
KTDNFS

#### **MULTI-4**

GDLKVEMMAGGTQITPLNDNVTIFCNIFYSQLNITSMGITWFWKSLTFDKEVKVFEFFGDHQEAFRPGAIVSPWR  
LKSGDASLRRLPGIQLEEAGEYRCEVVVTPKAQGTQVLEVVASPASRLLDQVGKEEEDKYMCESSGFYPEAINITW  
EKQTQKFPHPHIEISEDVITGPTIKNMDGTFNVTSCLLKSSQEDPGTVYQCVVRHASLHTPLRSNFTLTAARHSLSETE  
KTDNFS

#### **MULTI-5**

GDLKVEMMAGGTQITPLNDNVTIFCNIFYSQLNITSMGITWFWKSLTFDKEVKVFEFFGDHQEAFRPGAIVSPWR  
LKSGDASLRRLPGIQLEEAGEYRCEVVVTPKAQGTQVLEVVASPASRLLDQVGMKENEDKYMCESSGFYPEHINIT  
WEKQTQKFPHPHIEISEDVITGPTIKNMDGTFNVTSCLLNSSQEDPGTVYQCVVEHESLHTPLRSNFTLTAARHSLSET  
EKTDNFS

#### **MULTI-6**

GDLKVEMMAGGTQITPLNDNVTIFCNIFYSQLNITSMGITWFWKSLTFDKEVKVFEFFGDHQEAFRPGAIVSPWR  
LKSGDASLRRLPGIQLEEAGEYRCEVVVTPKAQGTQVLEVVASPASRLLDQVGMKENEDKYMCESSGFYPEAINIK  
WEKQTQKFPHPHIEISEDVITGPTIKNMDGTFNVTSCLLNSSQEDPGTVYQCVVEHASLSTPLRSNFTLTAARHSLSET  
EKTDNFS
