# Supplementary figures and images for: Computationally-driven identification of antibody epitopes
Source: eLife journal article supplement (doi:10.7554/elife.29023), 2017-12-04

PB11

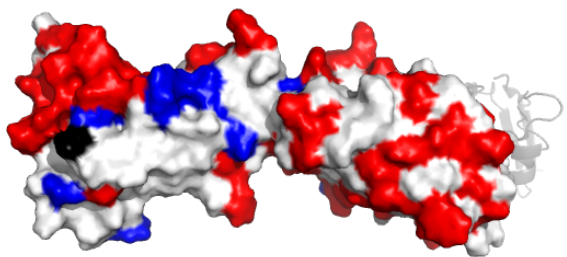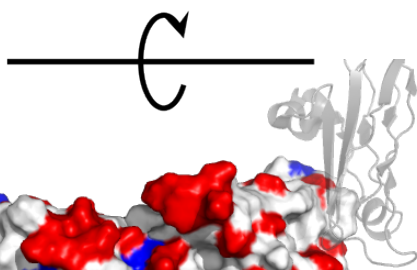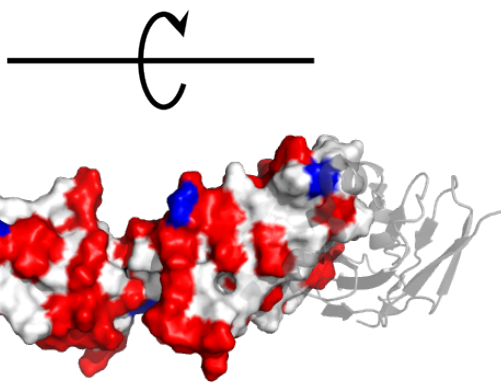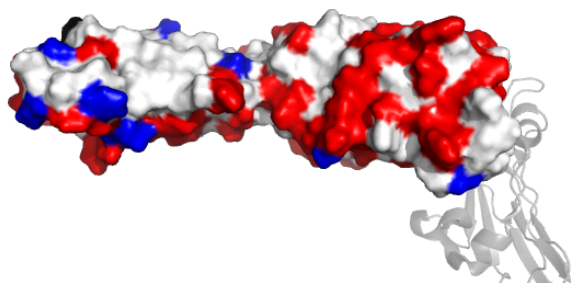

TZ47

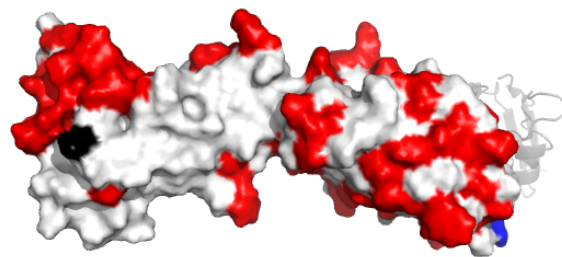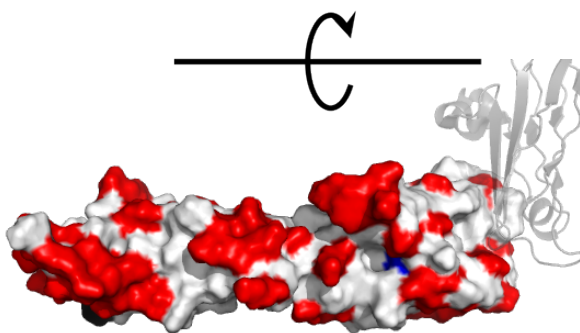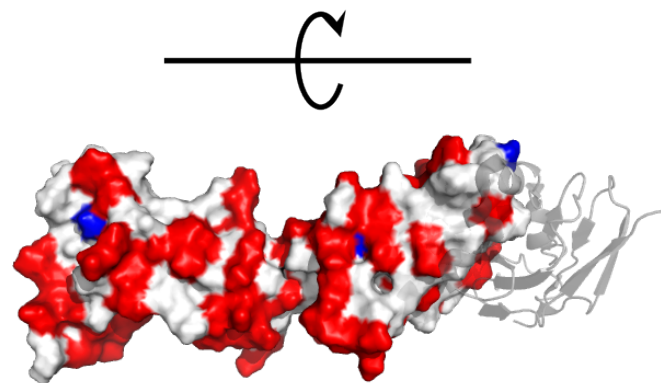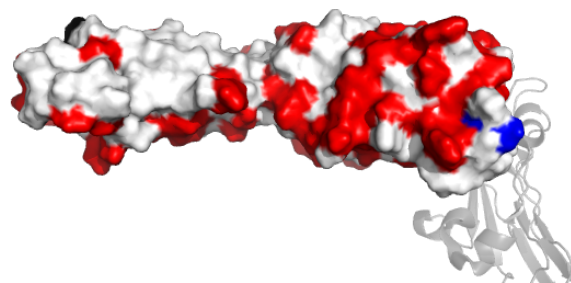

Supplement: supp [file elife_poa_e29023_Figure_3_figure_supplement_2.pdf › elife_poa_e29023_Figure_3_figure_supplement_2.pdf]

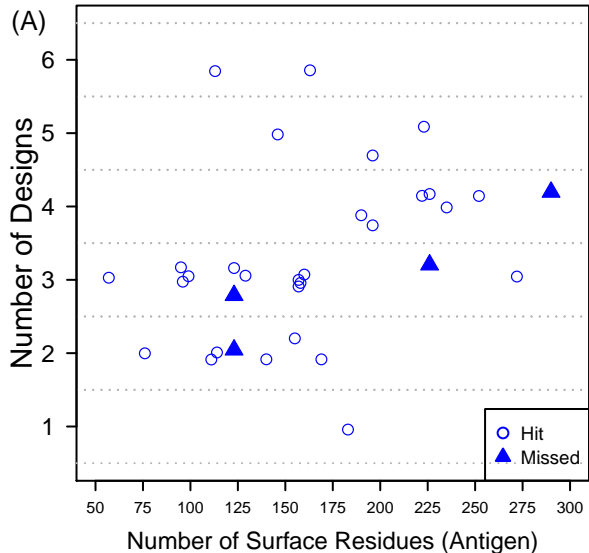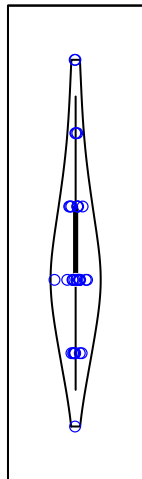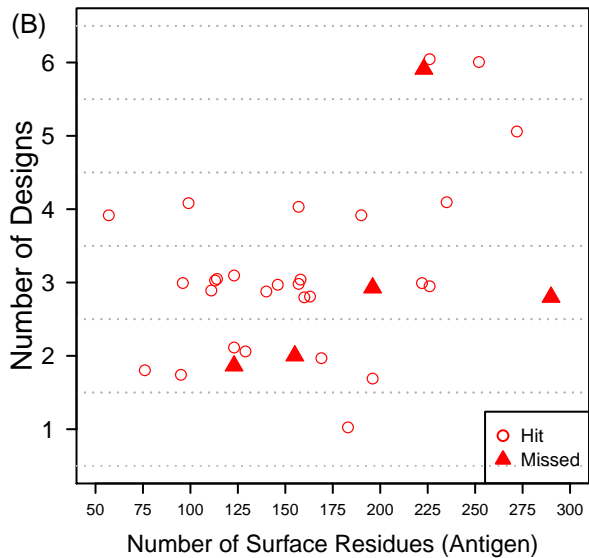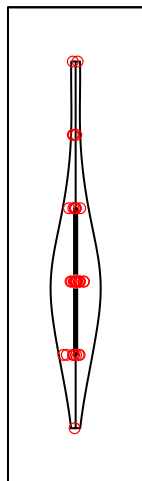

Supplement: supp [file elife_poa_e29023_Figure_4_figure_supplement_1.pdf › elife_poa_e29023_Figure_4_figure_supplement_1.pdf]

Success (%)

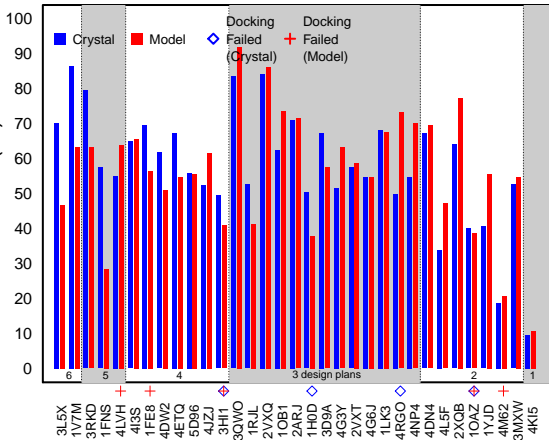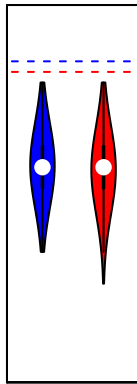

Supplement: supp [file elife_poa_e29023_Figure_4_figure_supplement_2.pdf › elife_poa_e29023_Figure_4_figure_supplement_2.pdf]

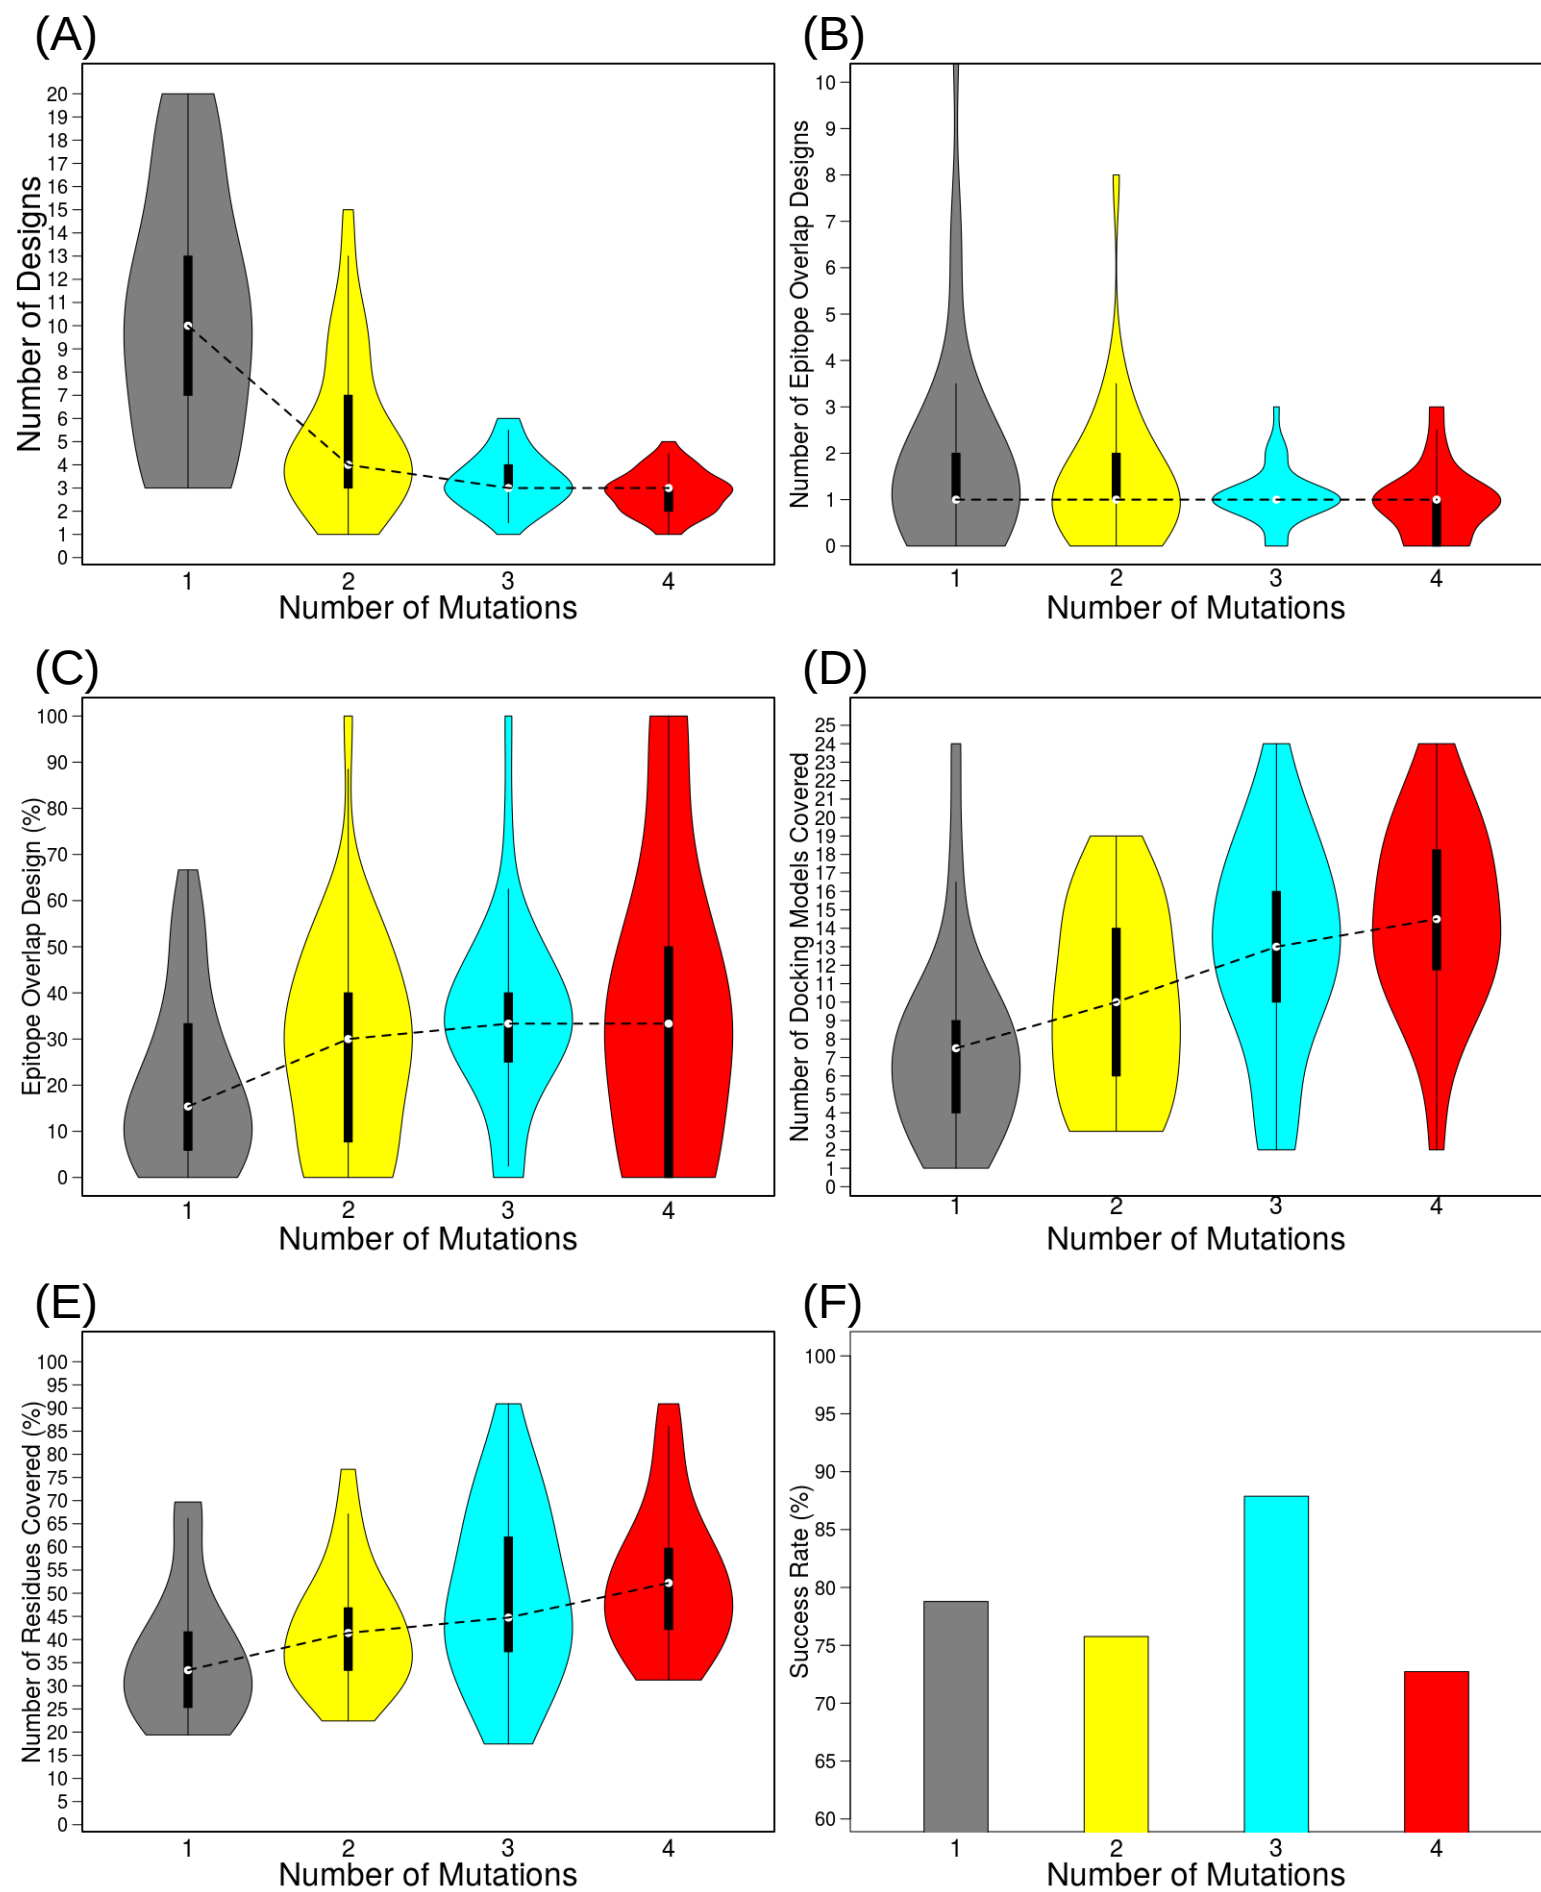

Supplement: supp [file elife_poa_e29023_Figure_4_figure_supplement_3.pdf › elife_poa_e29023_Figure_4_figure_supplement_3.pdf]

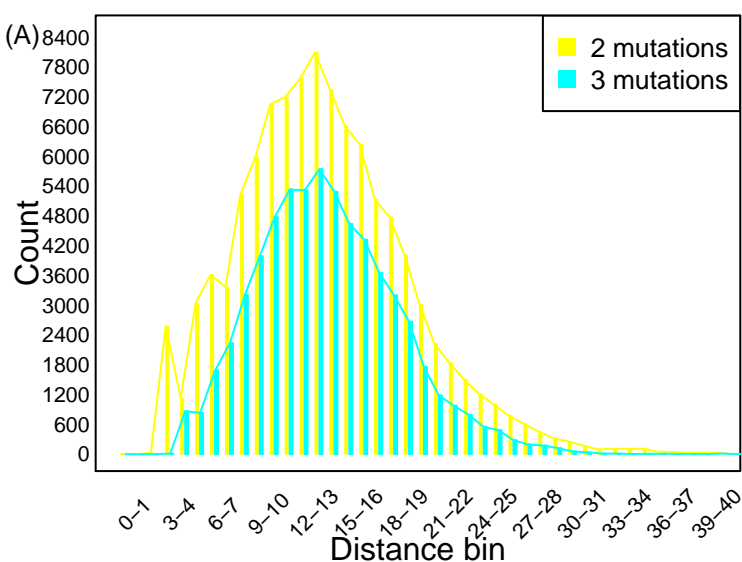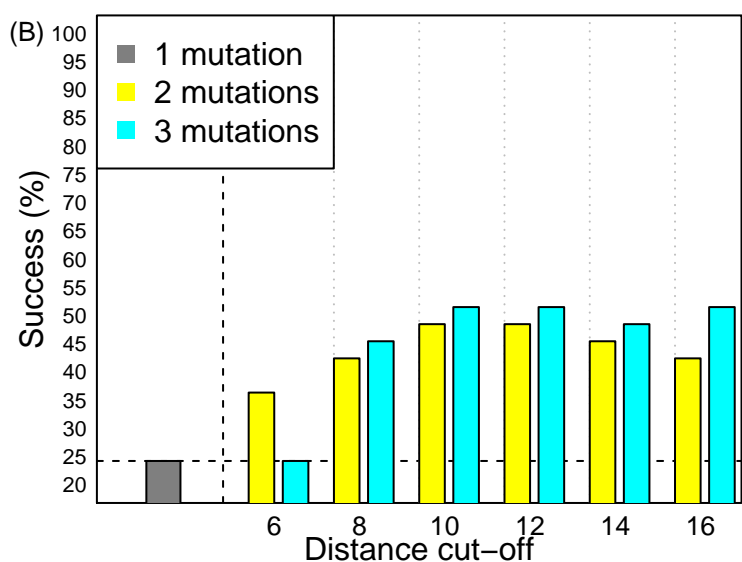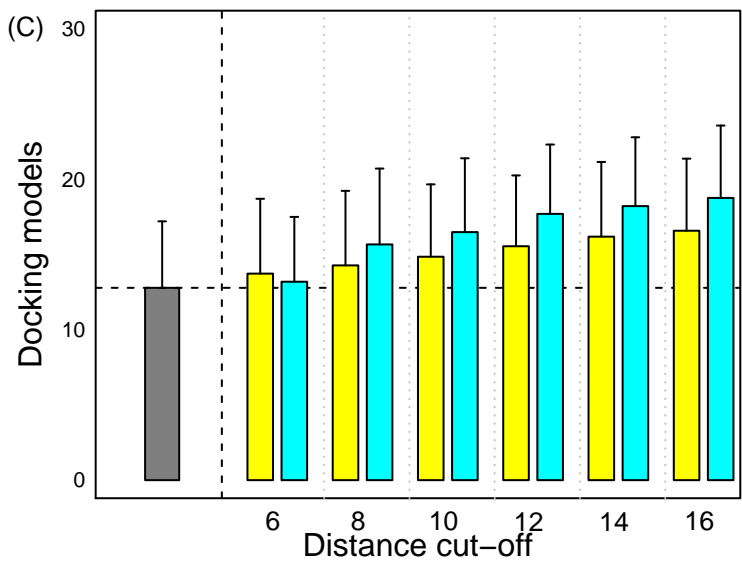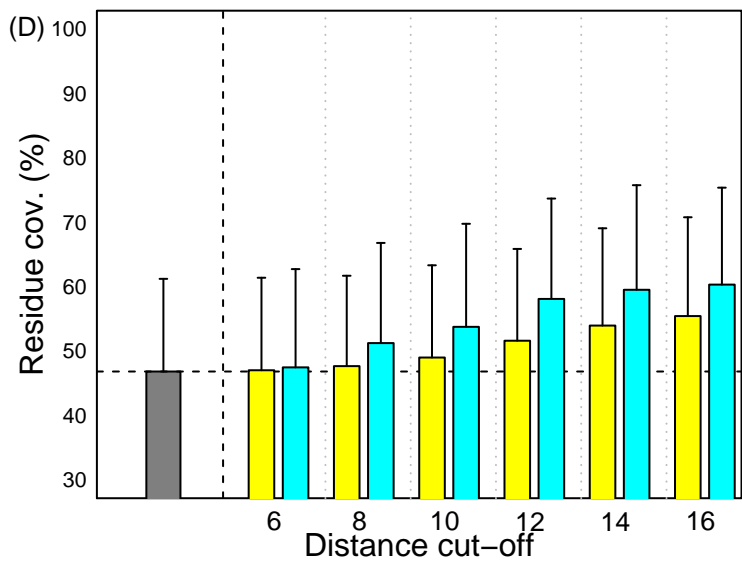

Supplement: supp [file elife_poa_e29023_Figure_4_figure_supplement_4.pdf › elife_poa_e29023_Figure_4_figure_supplement_4.pdf]

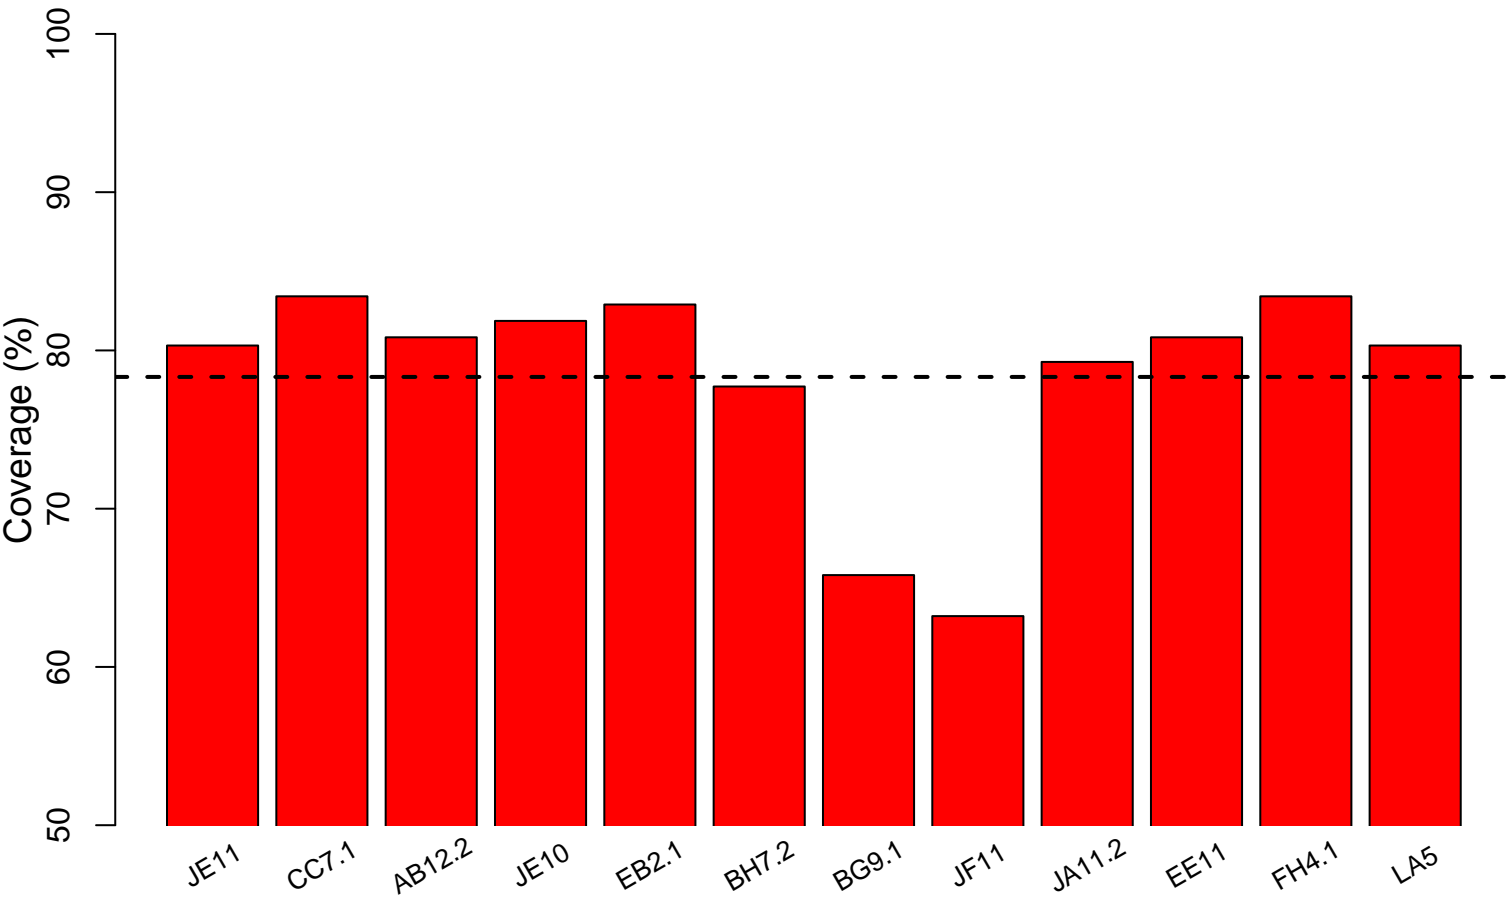

Supplement: supp [file elife_poa_e29023_Figure_5_figure_supplement_1.pdf › elife_poa_e29023_Figure_5_figure_supplement_1.pdf]

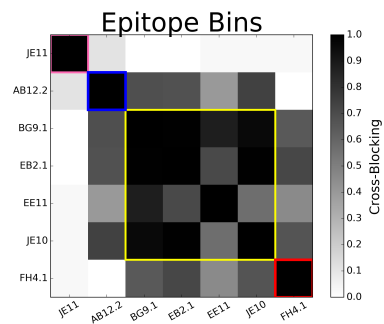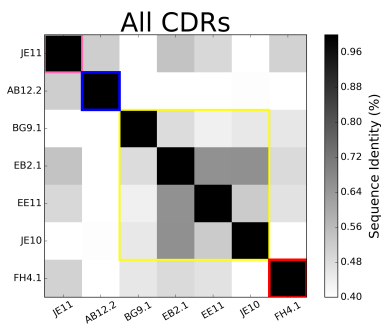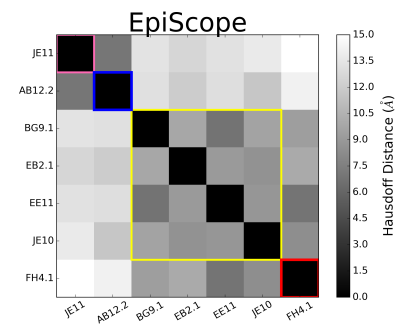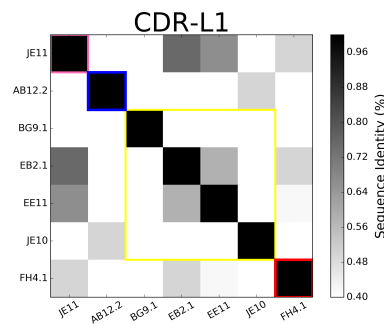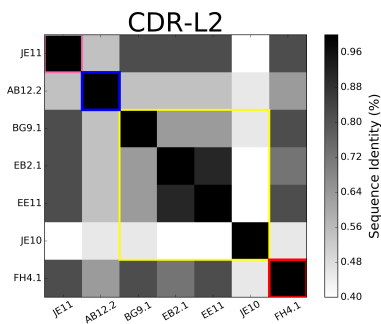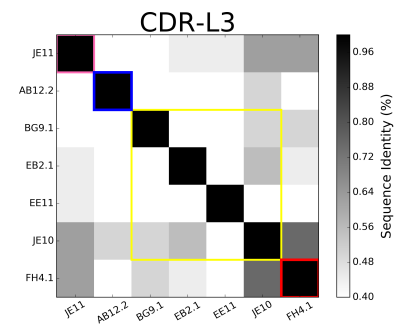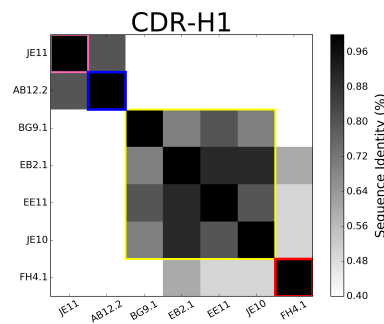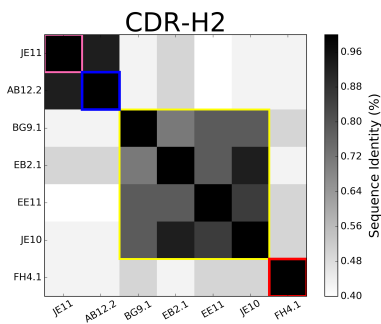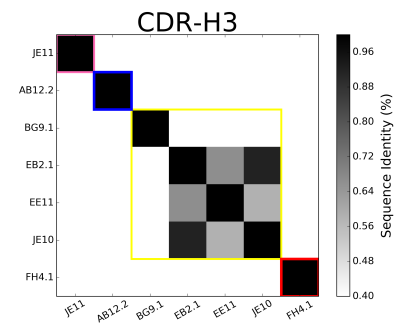

Supplement: supp [file elife_poa_e29023_Figure_5_figure_supplement_3.pdf › elife_poa_e29023_Figure_5_figure_supplement_3.pdf]

(A)

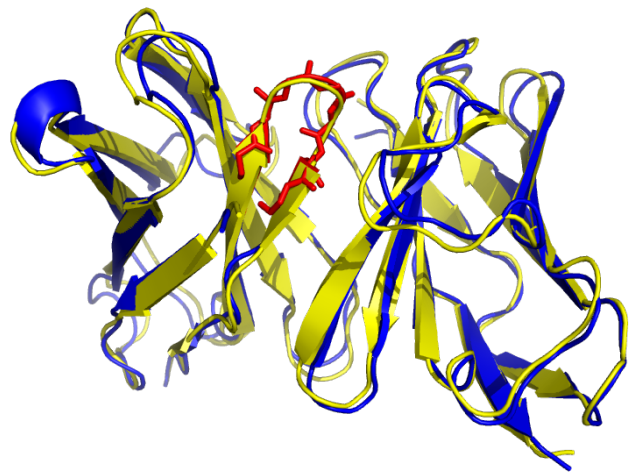

(B)

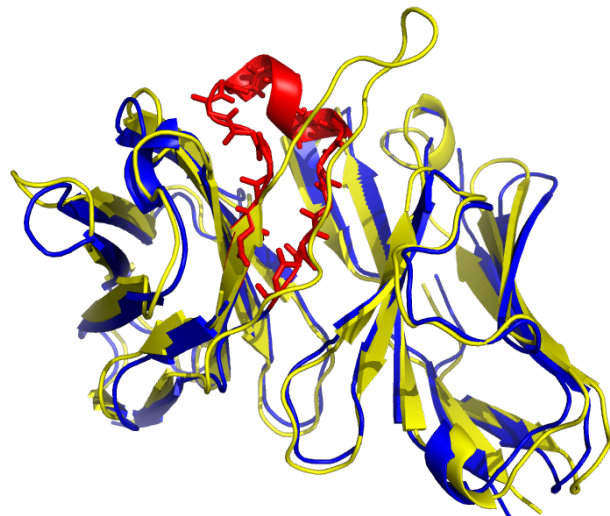

(C)

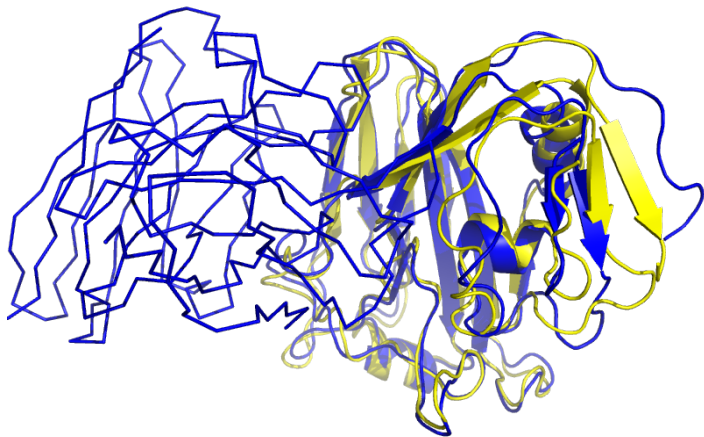

(D)

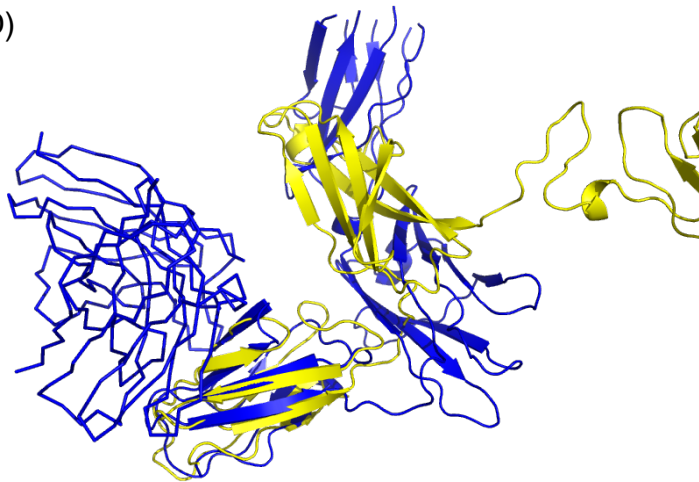

Supplement: supp [file elife_poa_e29023_Figure_6_figure_supplement_1.pdf › elife_poa_e29023_Figure_6_figure_supplement_1.pdf]
